# Supplementary material for: Serum-deprived differentiated neuroblastoma F-11 cells express functional dorsal root ganglion neuron properties
Source: PeerJ. 2019 Oct 30;7:e7951. doi: 10.7717/peerj.7951 (PMC6825413; doi:10.7717/peerj.7951)
Supplement: Supplemental Information 2 [file peerj-07-7951-s002.xls]

## Sheet: Foglio1
	1%FBS ACh 1mM			(related to Fig. 6A)
	cells	Hz cntr	Hz ACh	delta (%)	Vrest	Vrest ACh	delta (%) ACh	Vrest DTC+ACh	delta (%)DTC+ACh	EPSC cntr	EPSC ACh	delta (%) ACh	I ACh (pA)	EPSC DTC+ACh	delta (%)DTC+ACh	I DTC+ACh (pA)
	A1	0.13	3.1	2284	-28	-10	64			2.6	7.5	188	200
	A2	0.88	1.1	25	-32	-11	65			2.48	5.75	132	250
	B1	3.2	0.08	97.5	-29	-4	86			2.06	4.68	127	160
	B2				-26	-15	42			4.22	7.7	82	70
	B3	0.5	0.47	6	-31	-29	6.5						0
	B4	0.13	0.21	61.5	-33	-29	12			1.07	10.7	900	100
	B5	0.34	0.35	3	-27	-23	15						0
	B6	2.6	2.55	2	-32	-7	78
	C1	0.17	0.58	241	-37	-36	3			3.5	6	71	0
	D1									0.32	1.36	325	25
	E1				-39	-27	31			3.17	4.3	35	100
	E2				-10	2.5	125			0.63	11	1646	1200
	E3									0.96	4.1	327	20
	F1									1.27	5.95	369
	F2									0.7	9.25	1221	20	2.5	257	0
	F3									2.8	3.37	20	30	1.2	-57
	F4				-44	-35	20			1.16	6	417	30	1.7	46	0
	F5									0.57	4.38	668	10	1.2	110	0
	F6									1.3	9.3	615	100	3.2	146	0
	F7	0.26	1.61	519	-24	-13	46	-23	4	0.37	4.38	1083	40	0.51	38	0
	F8	0.94	10	963	-30	0	100
	F9				-69	-36	47	-65	6	3.18	7.66	140	80	1.63	-49	0
	F10				-60	-55	8
	G1									0.88	11.9	1252	40	1.43	62	0
	G2				-50	-20	60	-32	36	1.61	15.1	838	60	2.32	44	0
	H1				-70	-46	34	-57	18	4	5.7	43	100	1.97	-50	45
	H2				-42	-40	5						0
	H3				-34	-20	41	-19	41	0.73	16	2091	20
	I1												30
	I2												546
	I3												86
	I4												222
	I5												20
	I6												32
	I7												145
	I8												117
	I9												355
	I10												175
	L1												44
	L2												387
	L3												262
	L4												106
	L5
	mean				-37.35	-22.675	44.425	-39.2	21	1.79909	7.36727	572.273	136.368	1.766	54.7	5
	SD				15.0622	15.7299	34.2979	20.6446	16.9411	1.2358	3.74816	580.269	214.56	0.76722	98.3385	15
	SEM				3.36802	3.5173	7.66925	9.23255	7.57628	0.263473	0.799111	123.714	34.8062	0.242616	31.0974	4.74342
	1%FBS CAPS 3uM			(related to Fig. 5A)
	cells	Hz cntr	Hz CAPS	delta (%)	Vrest	Vrest CAPS	delta (%) CAPS			EPSC cntr	EPSC CAPS	delta (%) CAPS	I CAPS (pA)	cap (pF)	pA/pF
	A1									0.13	0.45	246	44	43	1.02326
	A2	0.26	0,31 (0,43 rec)		-41	-41							90	43	2.09302
		0.72	0,47 (0,82 rec)	35
	A3	0.98	1,5 (2.16 rec)		-30	-30							no
	B1									1.16	2,16 (1,21rec)	86	25	43	0.581395
	B2	0.83	0 (0,72 rec)	100						10	13 (8 rec)	30	20	43	0.465116
	B3	1.87	0,76 (0,76 rec)	59	-25	-25							no
	B4												no
	B5												no
	B6												no
	B7												no
	B8												no
	B9												no
	B10												no
	C1												39	43	0.906977
	C2	2.5	1,5 (1,3rec)		-27	-27							7		0.162791
	C3	1.8	2,25 (2,4rec)		-38	-38							no
	C4				-35	-34							no
	C5	0.31	0,6 (0,75rec)		-33	-30							no
	C6				-70	-59	15
	C7				-39	-30	23						8		0.186047
	C8												no
	C9				-57	-50	12						no
	D1												5		0.116279
	D2												no	90
	D3												no
	D4												no	48
	D5				-37	-37							no	30
	D6												no	33
	D7												10		0.232558
	D8												5	92	0.0543478
	D9												48	50	0.96
	E1												28	35	0.8
	E2												no
	E3												no
	E4												20	25	0.8
	E5				-38	-31	18						12	75	0.16
	E6												yes	20
	F1				-47								20	41	0.487805
	F2				-47								20	41	0.487805
	F3				-30								no
	F4				-43								no
	F5				-35								no
	F6				-31								no
	F7				-68								no
	G1				-36								10	25	0.4
	G2				-24								no
	G3				-58								no
	G4												yes
	G5				-33								yes
	mean			64.6667	-40.087	-36	17					120.667	24.1765		0.583376
	SD			32.8684	12.6452	9.97269	4.69042					112.095	21.5645		0.551365
	SEM			14.6992	3.1613	2.49317	2.34521					64.7182	5.56794		0.147359
	1%FBS pH 5		(related to Fig. 5C)
	cells				Vrest	Vrest pH	delta (%) pH						I pH (pA)	cap (pF)	pA/pF
	A1				-58								1516	25	60.64
	A2				-40								1248	40	31.2
	A3				-33	2	109						537	48	11.1875
	A4				-40								2727	60	45.45
	A5				-34	-2	94						828	39	21.2308
	A6												885	40	22.125
	A7				-32								2092	40	52.3
	A8				-29								1053	24	43.875
	A9				-29	9	131						605	25	24.2
	A10				-43								512	63	8.12698
	B1												3349	59	56.7627
	B2				-40								1630	78	20.8974
	B3				-26								1300	53	24.5283
	B4				-27								845	24	35.2083
	B5				-30								120	27	4.44444
	B6				-38	-2	95						334	30	11.1333
	B7				-34								911	87	10.4713
	C1				-39								105	54	1.94444
	C2				-30								345	47	7.34043
	C3				-27								185	32	5.78125
	C4												738	36	20.5
	C5				-52								1550	63	24.6032
	C6				-23								892	68	13.1176
	C7				-33								378	36	10.5
	C8				-32	-2	94						262	36	7.27778
	C9				-29								196	69	2.84058
	D1				-71								1076	44	24.4545
	D2												316	33	9.57576
	D3				-35	13	137						980	26	37.6923
	D4				-48								541	79	6.8481
	D5				-38	-6	84						475	61	7.78689
	D6				-40								596	18	33.1111
	D7				-27								1590	25	63.6
	mean				-36.4483	1.71429	106.286						930.818	45.1212	23.0532
	SD				9.15302	5.56776	20.361						741.204	18.5283	17.7909
	SEM				2.04668	1.24499	7.69574						131.028	3.27537	3.14502
	1%FBS pH 6		(related to Fig. 5D)
	cells				Vrest	Vrest pH	delta (%) pH						I pH (pA)	cap (pF)	pA/pF
	A1												3736	59	63.322
	A2				-32	2	106						2793	78	35.8077
	A3				-26	0	100						1382	53	26.0755
	A4												1576	27	58.3704
	A5				-27								1017	24	42.375
	A6				-30	-3	90						229	27	8.48148
	A7				-38	-3	92						470	30	15.6667
	A8				-34								1419	87	16.3103
	B1				-34	-15	56						123	54	2.27778
	B2				-30								548	47	11.6596
	B3				-27								245	32	7.65625
	B4												993	36	27.5833
	B5				-52
	B6				-23								1146	68	16.8529
	B7				-33								770	36	21.3889
	B8				-37	2	105						916	36	25.4444
	B9				-29								333	69	4.82609
	C1				-71								1027	44	23.3409
	C2												295	33	8.93939
	C3				-35	8	122						850	26	32.6923
	C4				-48								777	79	9.83544
	C5				-43	-7	84						558	61	9.14754
	C6				-27								1257	25	50.28
	mean				-35.5789	-2	94.375						1020.91	46.8636	23.5606
	SD				11.4082	6.6106	19.4491						848.553	19.8453	17.3486
	SEM				2.55094	1.47817	6.8763						180.912	4.23104	3.69874
	10%FBS pH5, pH6			(Related to Fig. 5C and D)
	cells	I pH6 (pA)	cap (pF)	pA/pF	I pH5 (pA)	cap (pF)	pA/pF
	A1	7	21	0.333333	6	21	0.285714
	A2	0	28		0	28
	A3	0	18		0	18
	A4	0	22		0	22
	A5	15	34	0.441176	17	34	0.5
	A6	0	32		0	32
	A7	0	32		10	32	0.3125
	A8	6	30	0.2	7	30	0.233333
	A9	0	26		0	26
	A10	0	25		0	25
	A11	5	23	0.217391	7	23	0.304348
	A12	0	23		0	23
	A13	0	23		0	23
	A14	10	19	0.526316	23	19	1.21053
	A15	0	21		0	21
	A16	0	52		0	52
	mean	8.6	26.8125	0.343643	11.6667	26.8125	0.474404
	SD	4.03733	4.19325	0.141033	6.86052	8.28025	0.371855
	SEM	1.80555	0.937639	0.0498627	2.80079	2.92751	0.131471
	1%FBS CNQX 10uM
	cells	Hz cntr	Hz CNQX	delta (%)	Vrest	Vrest CNQX	delta (%) CNQX
	A1	0.57	2.8	391	-35	-35
	A2				-53	-48	9
	A3	0.64	0.63		-43	-43
	A4				-26	-18	30
	A5	0.25	0.3	20	-30	-24	20
	B1	0.37			-28	-28
	mean			205.5	-35.8333	-32.6667	19.6667
	SD			123.019	10.3811	11.4833	10.504
	SEM			27.508	2.32128	2.56775	2.34876
	1%FBS CNQX 10uM+AP5 40uM				(related to Fig. 6B)
	cells	Hz cntr	Hz CNQX+AP5	delta (%)	Vrest	Vrest CNQX+AP5	delta (%) CNQX+AP5
	A1				-48	-39	19
	A2	0.64	0.57	11	-44	-48	9
		0.8	0.84		-44	-44
	A3				-26	-18	31
	A4	0.25	0.44	76	-30	-24	20
	B1	0.42	0.46
	B2	4	0.48	88	-28	-28
	B3	1.85	1.2	35
	mean			52.5	-36.6667	-33.5	19.75
	SD			45.9619	9.68848	11.929	8.99537
	SEM			10.2774	2.16641	2.6674	2.01143
	1%FBS Glu 1 mM			(related to Fig. 6B)
	cells	Hz cntr	Hz Glu	delta (%)	Vrest	Vrest Glu	delta (%) Glu		delta (%)CNQX+AP5+Glu				I Glu (pA)			I Glu+AP5+CNQX
	A1	0.45	0.6	33	-39	-39
	A2				-30	-20	33
	A3				-60	-56	7		3				32			7
	A4						no
	B1						17		0				55
	B2												44
	B3	1.85	2.58	39			no
	B4						dep
	B5						no
	C1						dep
	C2						no						6
	C3												10
	C4												4
	C5						dep						5
	D1						30		8				227			38
	D2												29			8
	D3						46		7				10			0
	D4						11		4				31			0
	D5						dep						5
	D6												224			120
	D7						dep						66			25
	D8						24						16
	E1						no
	E2						dep						9
	E3						48		32				48			35
	mean			36	-43	-38.3333	27						48.2941			29.125
	SD			4.24264	15.3948	18.0093	15.1752						69.4359			39.6788
	SEM			0.948683	3.44238	4.02699	5.36523						16.8407			9.62353
	1%FBS SP 2uM			(related to Fig. 5B)
	cells	Hz cntr	Hz SP	delta (%)	Vrest	Vrest SP	delta (%) SP						I SP (pA)	cap (pF)	pA/pF
	A1												no
	A2						no						5	107	0.046729
	A3						no						no
	A4												21	39	0.538462
	B1				-30	-28.5	5						5	36	0.138889
	B2	2	1,7 (1,5 rec)		-30	-27	10						no
	B3						no						no
	B4				-59	-56	3
	B5				-60	-58	3
	B6				-61	-44	20						13	64	0.203125
	C1												24
	C2												no
	C3												sì
	C4						no						no
	D1				-42	-26.46	37						19	32	0.59375
	D2				-51	-36.72	28						10	55	0.181818
	D3						dep						no
	D4	1.64	3,15 (1,36 rec)	92			34						15	51
	E1						dep						no
	E2				-57	-18.24	68						15	27	0.555556
	mean			92	-48.75	-36.865	23.1111						14.1111	51.375	0.231801
	SD				13.1122	14.5711	21.4152						6.66041
	SEM				4.63585	5.15165	7.1384						2.22014
	1%FBS SP 2uM, pH5, CAPS 3uM				(related to Fig. 5)
	cells	pF	CAPS (pA)	SP (pA)	pH5		spontaneous activity
	A1	30	16	8	224		yes
	A2	29	4	7	495		yes
	A3	35	0	0	1036
	A4	49	0	0	360
	A5	23	0	0	287
	A6	28	0	0	150
	A7	43	4	8	88
	B1	39	0	0	263
	1%FBS Glu 1 mM CNQX, AP5				(related to Fig. 6B)
	cells	I Glu (pA)	cap (pF)	pA/pF	I Glu+AP5	I Glu+CNQX	Hz cntr	Hz Glu	Hz Glu+AP5	Hz Glu+CNQX
	A1	23	48	0.479167
	A2	8	43	0.186047
	A3	4	43	0.0930233	3
	A4	12	38	0.315789	15	0
	B1	9	35	0.257143	8	0
	B2	4	32	0.125	0	0
	B3						0.24	0.93	0.72	0.22
	B4						0.15	0.54	0.45	0.15
	10%FBS ACh, Glu, CAPS, SP				(related to Fig. 5 and Fig. 6)
	cells	pF	ACh 1mM (pA)	Glu 1mM (pA)	CAPS 3uM (pA)	SP 2uM (pA)
	A1	23	23	0	0	0
	A2	19	35	0	0	0
	A3	26	27	0	0	0
	A4	15	193	0	0	0
	A5	26	43	0	0	0
	A6	21	52	0	2	0
	A7	20	42	4	2	0
	B1	26	50
	B2	20	16	0	0	0
	B3	16	7	0	0	0
	B4	18	12	0
	B5	20	28	0	0	0
	B6	25	56	8	0	0
	B7	24	27	0	0	0
	mean		43.6429	6	2	0
	SD		45.5574
	SEM		12.1757
	1%FBS pH5, ATP, CAPS			(related to Fig.7)
	cells	pF	pH5 (pA)	ATP 10uM (pA)	CAPS 3uM (pA)
	A1	31	101	0	0
	A2	42	98	0	0
	A3	50	26	0	0
	A4	46	42	0	21
	A5	23	129	0	0
	A6		35	0	0
	B1		554	0	128
	B2	29	not	not	not
	B3	40	123	0	0
	B4	27	not	not	not
	B5	15	not	not	not
	B6	38	yes	0	0
	B7	55	yes	0	0
	C1	21	207	0	0
	C2	14	yes	0	31
	C3	21	yes	0	0
	C4	29	yes	0	0
	C5	20	yes	0	0
	D1	34	91
	D2	40	yes	0	0
	1%FBS pH5+amiloride, Glu +AP5				(related to Fig. 7)
	cellula	pF	pH5 (pA)	pH5+amiloride (pA)	block(%)		glu (pA)	glu+AP5 (pA)	block(%)
	A1		54	6	89		6	10	0
	A2		15	14	7
	A3						11	16	0
	A4		24	24	0
	A5		23	24	0
	A6		39	40	0
	A7		10	3	30
	A8
	A9
	A10
	B1
	B2		10	0	100
	B3		7	7	0
	B4		14	6	67
	B5		8	8	0
	B6		10	5	50
